# Supplementary material for: Investigating the use of sensory information to detect and track prey by the Sunda pangolin (Manis javanica) with conservation in mind
Source: PubMed Central journal article supplement (PMC7300028; doi:10.1038/s41598-020-65898-x), 2020-06-17
Supplement: 41598_2020_65898_MOESM1_ESM.pdf [file 41598_2020_65898_MOESM1_ESM.pdf]

1 **Supplementary Information**

2  
3  
4  
5 **Investigating the use of sensory information to detect and track prey by the Sunda**  
6 **pangolin (*Manis javanica*) with conservation in mind**

7  
8 Joshua D. DiPaola<sup>1</sup>, Marnoch Yindee<sup>2\*</sup>, Joshua M. Plotnik<sup>1,3</sup>

9  
10 **Author Affiliations:**

- 11 1. Animal Behavior and Conservation Program, Dept. of Psychology, Hunter College, City  
12 University of New York, 695 Park Avenue, Room 611N, New York, NY 10065, USA  
13 2. Livestock and Wildlife Hospital, Faculty of Veterinary Science, Mahidol University, 199  
14 Moo 9, Highway No. 323, Sai Yok, Kanchanaburi 71150, Thailand  
15 3. Cognitive and Comparative Psychology Program, Graduate Center, City University of  
16 New York, 365 Fifth Avenue, New York, NY 10016, USA

17  
18 **Author for Correspondence: Joshua M. Plotnik, e-mail: [Joshua.Plotnik@gmail.com](mailto:Joshua.Plotnik@gmail.com)**

19  
20 **\*Present Address: Akkharatchakumari Veterinary College, Walailak University, 222**  
21 **Thaiburi, Thasala, Nakhon Si Thammarat 80161, Thailand**

22 **Keywords:** pangolins; conservation; cognition; olfactory cognition  
23

24

25

26

27

28

29

30

31

32

33 **Supplemental Video Legends**

34 Video S1. In this Phase I ‘olfactory’ condition trial, Pluto chooses the baited container on the left  
35 side of the apparatus. Videos S1-S3 were recorded in near total darkness using the infrared  
36 recording capabilities of the SONY camera described in the Methods section.

37

38 Video S2. In this Phase II ‘olfactory distance’ trial, Pluto investigates both sides and chooses the  
39 baited container on the right side of the apparatus. This is a 30-cm trial.

40

41 Video S3. In this Phase II ‘scent trail’ trial, Pluto chooses the right trail leading to the baited food  
42 container in an F vs. W trial.

43

44

45
